# Supplementary material
Source: PubMed Central journal article supplement (PMC6949429)
Supplement: NIHMS1541640-supplement-2.pdf [file NIHMS1541640-supplement-2.pdf]

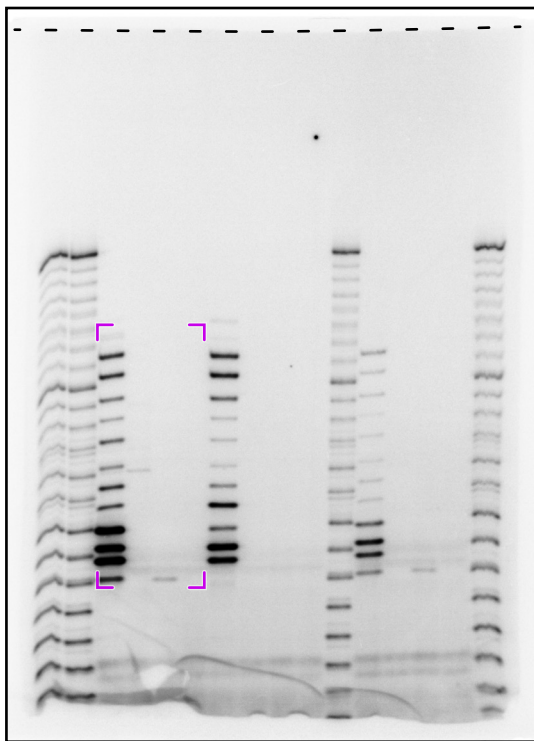

Figure 1c

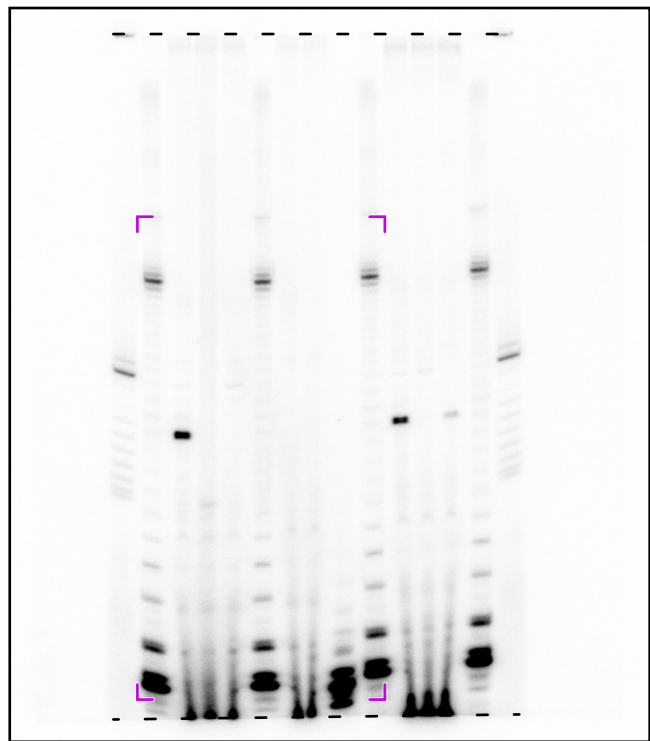

Figure 1d

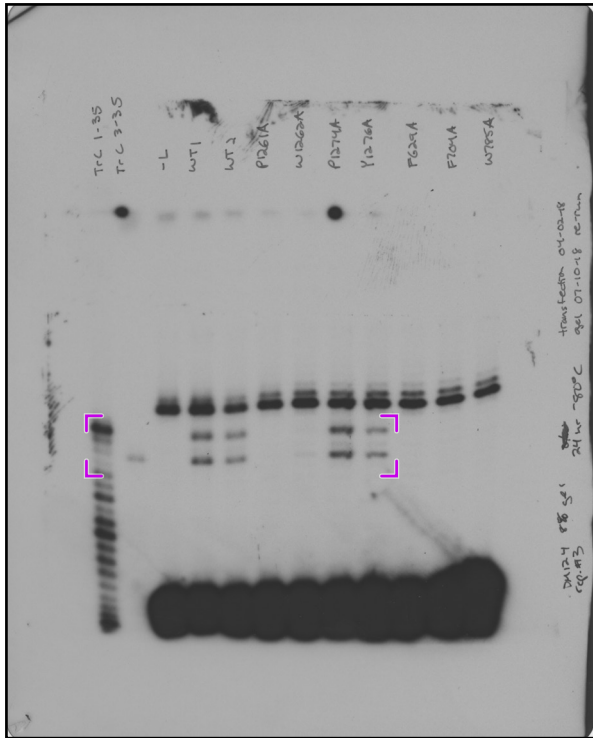

Figure 2e

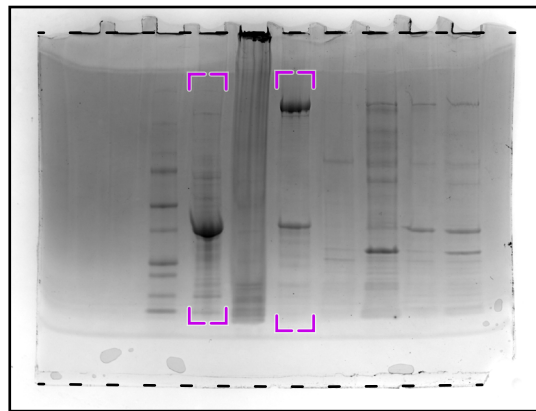

Extended Data Fig. 1a

**Supplementary Figure 1** - Original source images for all data obtained by electrophoretic chromatography. Violet marks indicate how the images were cropped for the figures of the manuscript. When required, the top and bottom extremities of the gel are shown with a black dashed line.

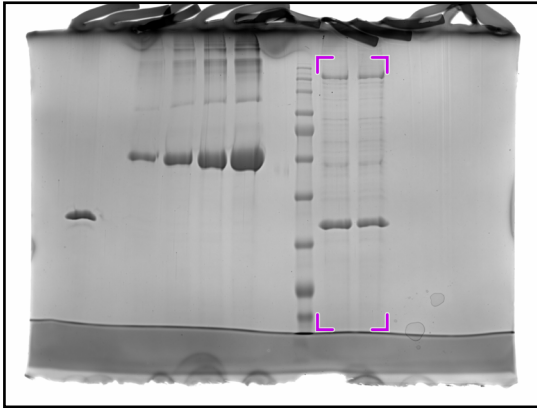

Extended Data Fig. 2a

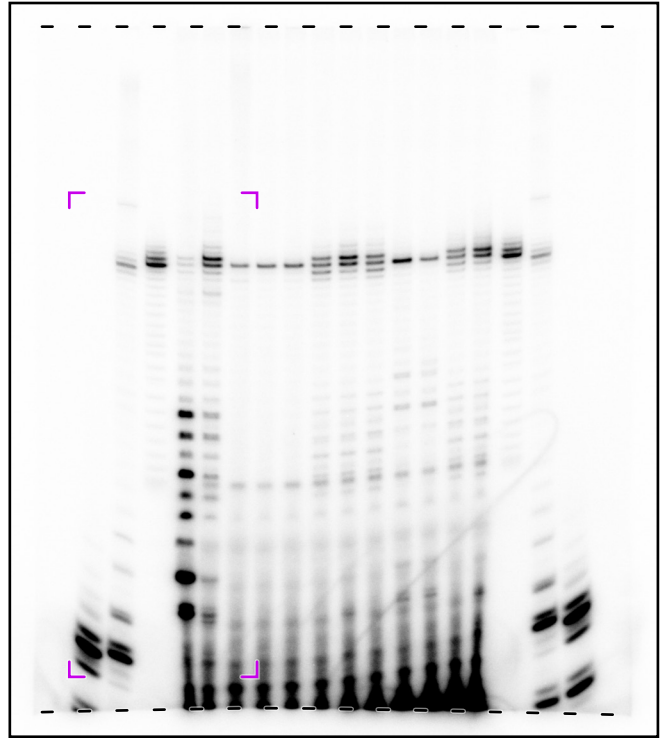

Extended Data Fig. 2b
