# Supplementary material
Source: PubMed Central journal article supplement (PMC6949429)
Supplement: NIHMS1541640-supplement-3.pdf [file NIHMS1541640-supplement-3.pdf]

HMPV\_L

β1

α1

1                    10                    20                    30

HMPV\_L                    . . . . . MDP.LNE.STVN**V**Y**L**P**D**S**Y****K**G**V**I**S**F**S**E**T**N**A**I**G**

RSV\_L                    . . . . . MDPIING.NSAN**V**Y**L**T**D**S**Y****K**G**V**I**S**F**S**E**C**N**A**L**G**

hPIV3\_L                    MI.INQQS.DNRQKGNIKNLGAKRARNMDTESNNGTVSD**I**L**Y**P**E**C**H****L**N**S**P**I**V**K**G**R**I**A**Q**L**H

MUMPS\_L                    . . . . . MAGLNE**I**L**L**P**E**V**H****L**N**S**P**I**V**R**Y**K**L**F**Y**I**

MEASLES\_L                    . . . . . MDSLSVNO**I**L**Y**P**E**V**H****D**S**P**I**V**T**N**K**I**V**A**I**L**

NIPAH\_L                    . . . . . MADELSISD**I**I**Y**P**E**C**H****D**S**P**I**V**S**G**K**L**I**S**A**I**

EBOLA\_L                    . . . . . MATQHTQ**Y**P**D**A**R****S**S**P**I**V**L**D**Q**C**D**L**V**T**

MARBURG\_L                    . . . . . MQHP**T**Q**Y**P**D**A**R****S**S**P**I**I**L**D**Q**C**D**L**L**A**

VSV\_L                    .MEVHDFETDEFNDFNEDDYATREFLN**P**D**E**R**M**T. . . . . Y**L**N**H**A**D**Y**N****N**S**P**L**I**S**D**D**I**D**N**L**I**

RABIES\_L                    MLD**P**G**E**V**Y**D**D**P**I**D**V**E**S**D. . . . . A**E**P**R**G**A**P**S**V**P**N. . . . . **I**L**R**N**S****D**Y**N****N**S**P**L**I**E**D**P**V**R**L**M**L**

HMPV\_L

α2                    α3

40                    50                    60                    70

HMPV\_L                    .SCL**L**K**R**P**Y**L**K**N**D**N**T**A**K**V**A**I**E**N**P****V**I**E**. . . . . H. . . . . V**R****L**K**N**A**V**N**S**K**M**K**T**S. . . . .

RSV\_L                    .SY**I**F**N**G**P**Y**L**K**N****D**Y**T**N**L**I**S**R**Q**N**P****L**I**E**. . . . . H. . . . . I**N****L**K**K**L**N**I**T**Q**S**L**M**S**K**Y. . . . . H**K**

hPIV3\_L                    T**I**M**S****L**P**Q**P**Y**D**M**D**D**S**I**L**V**I**T**R**Q**K**I**R**L**N**K**L**D**K**R**Q**R**S. . . . . I**R**. . . . . R**L**K**L**I**L**T**E**K. . . . . V**S**D**L**G

MUMPS\_L                    L**H**Q**L**P**N**D**L**E**P**D**D**L**G**P**L**A**N**Q**N**W**K**A**I**R. . . . . S**E**E**S**Q**V**H**A**R**L**K**Q**I**R**V**E**L**I**A**R**I**P**S**L**R**W**T**R**S**Q**R

MEASLES\_L                    E**Y**A**R****V**P**H**A**Y**S**L**E**D**P**T**L**C**Q**N**I**K**H**R**L**K**N. . . . . G**F**S**N**Q**M**I. . . . . I**N**N**V**.E**V**G**N**V**I**K**S**K. . . . . L**R**S**Y**P

NIPAH\_L                    E**Y**A**Q**L**R**H**N**Q**P**S**D**D**K**R**L**S**E**N**I**R**L**N**L**H**G**. . . . . K**R**K**S**L**Y**I. . . . . L**R**Q**S**.K**Q**G**D**Y**I**R**N**N. . . . . I**K**N**L**K

EBOLA\_L                    R**A**C**G**L**Y**S**S**Y**S**L**N**P**Q**. . . . . L**R**N**C**K**L**P**K**H. . . . . I**Y**R**L**K**Y**D**V**T**V**T**K**F**L**S**D**. . . . . V**P**V**A**T

MARBURG\_L                    R**S**L**G**L**Y**S**H**Y**S**H**N**P**K**. . . . . L**R**N**C**R**I**P**H**H. . . . . I**Y**R**L**R**N**S**T**A**L**K**T**F**L**O**N**. . . . . C**S**I**L**T

VSV\_L                    R**K**F**N**S**L**P**I**P**S**M**W**D**S**. . . . . K**N**W**D**G**V**. . . . . L**E**M**L**T. . . . . L**E**M**L**T. . . . .

RABIES\_L                    E**W**L**K**T**G**N**R**P**C**R**M**T**L**T**D**N**C**S**R**S**Y**K**V**L. . . . . L**E**M**L**T. . . . . L**E**M**L**T. . . . . K**D**Y**E**K.

HMPV\_L

α4                    α5                    α6

80                    90                    100                    110

HMPV\_L                    .D**Y**K**V**V**E**P**V**N**M**Q**H**E**I**M**K**N**V**H**S**. . . . . C**E**L**T**L**L**K**Q**F**L**T**R**S**K**N**I**S**T**L**K**L**N**. . . . .

RSV\_L                    G**E**I**K**I**E**P**T**Y**F**Q**S**L**L**M**T**Y**K**S**M**T**S**L. . . . . E**Q**I**T**T**N**L**L**K**K**I**I**R**R**A**I**E**I**S**D**V**K**V**Y**. . . . .

hPIV3\_L                    K**Y**T**F**I**R****P**E**M**S**K**E**M**F. . . . . K**L**H**I**P**G**I**N**S**K**V**T**E**L**L**L**K**A**D**R**T**Y**S**Q**M**T**D**G**L**R**D**L**W

MUMPS\_L                    E**I**A**I**L**I**W**P**R**I**L**P**I**L**Q. . . . . A**Y**D**L**R**Q**S**M**Q**L**P**T**V**W**E**K**L**T**Q**S**T**V**N**L**I**S**D**G**L**E**R**V**V

MEASLES\_L                    A**H**S**H**I**P**Y**P**E**C**N**N**I**L**F. . . . . N**I**E**D**K**E**S**T**R**K**I**R**E**L**L**K**G**N**S**L**Y**S**K**S**V**S**D**K**V**F**Q**C**L

NIPAH\_L                    E**F**M**H**I**A****P**E**C**N**N**I**L**F. . . . . S**I**T**S**Q**G**M**T**S**K**L**D**N**I**M**K**K**S**F**K**A**Y**N**I**I**S**K**R**V**I**G**M**L

EBOLA\_L                    L**P**I**D**F**I**V**P**V**L**L**K**A**L**S. . . . . G**N**G**F**C**P**V**E**P**R**C**Q**Q**F**L**D**E**I**I**K**Y**T**M**Q**D**A**L**F**L**K**Y**L**K**N**V**G**A**Q**E**D**C

MARBURG\_L                    V**P**F**H**S**I**W**D**H**I**L**T**S**I**Q. . . . . Y**D**A**I**N**H**V**D**D**F**K**Y**L**L**P**S**E**L**V**K**Y**A**N**W**D**N**E**F**L**K**A**Y**L**N**K**I**L**G**D**H**V

VSV\_L                    . . . . . S**C**Q**A**. . . . . N**P**I**S**T**S**Q**M**H**K**.

RABIES\_L                    . . . . . K**V**D**L**D**S**L**K****V**G**T**A**A**Q**S**.

HMPV\_L

α7

120

HMPV\_L                    .M**I**T**C**D**W**L**Q**L**K**S. . . . . T**S**D.

RSV\_L                    .A**I**L**N**K**L**G**L**K**E**K**D**K**I**K**S**N**N**G**Q**E**D**N. . . . . S**V**I**T**I**I**K**D**D**I**L**A**V**K**D**N**Q**S**H**L**K**A**V**K**N**H**S**T**K**Q**K

hPIV3\_L                    I**N**V**L**S**K**L**A**S. . . . . K**N**D**G**S**N**Y. . . . .

MUMPS\_L                    L**H**I**S**N**Q**L**T**G**K**P**N**L**F**T**R**S**R**A**G**Q**D**. . . . . A**K**

MEASLES\_L                    R**D**T**N**S**R**L**G**L. . . . . G**S**E**L**. . . . .

NIPAH\_L                    Q**N**I**T**R**N**L**I**T. . . . . Q**D**R**R**D**E**I. . . . . I**N**

EBOLA\_L                    . . . . . V**D**E**H**F**Q**E**K**. . . . .

MARBURG\_L                    . . . . . F**S**A**S**A**R**S**Q**C. . . . .

VSV\_L                    .W**M**G**S**W**L**M**S**D**N**H**D**A**S**Q**G**Y**S**F**L**H**E**V**D**K**E**A**E**I**T**F**D**V**V**E. **T**F**I**. . . . . R**G**W**G**N**K**P**I**. . . . .

RABIES\_L                    .M**I**T**S**L**W**L**Y**G**A**H**S**E**S**N**R**S**R**R**C**I**T**D**L**A**H**F**Y**S**K**S**S**P**I**E**K**.L**L**N. . . . . C**T**L**G**N**R**G**L**K.

HMPV\_L

TT                    α7

130                    140                    150                    160

HMPV\_L                    D. . . . . T**S**I. . . . . L**S**F**I**D**V**E**F**I**P**S**W**. . . . . V**S**N**W**F**S**N**W**Y**N****L**N**K**L**I**L**E**F**R**.R**E**E. . . . .

RSV\_L                    D**T**I**K**T**T**L**L**K**L**M**C**S**M**Q**H**P**P**S**W**. . . . . L**I**H**W**F**N**L**Y**T**K**L**N**I**L**T**Q**Y**R**.S**S**E. . . . .

hPIV3\_L                    N**E**E**I**N**N**I**S**K**V**H**T**. . . . . Y**K**L**D**K**W**Y**N**. . . . . P**F**K**T****W**F**T**I**K**Y**D****M**R**R**L**L**Q**K**A**R**N. **E**V**T**. . . . .

MUMPS\_L                    D**S**S**I**P**S**T**R**E**L**S**Q**I. . . . . W**F**N**N**E**W**S**G**. . . . . S**V**K**T****W**L**M**I**K**Y**R****M**R**L**I**T**N**Q**.T**G**E. . . . .

MEASLES\_L                    E**D**I**K**E**K**V**I**N**L**G**V**Y. . . . . M**H**S**S**Q**W**F**E**. . . . . P**F**L**F****W**F**T**V**K**T**E****M**R**S**V**I**K**S**Q**T**.H**T**C. . . . .

NIPAH\_L                    I**H**E**C**R**R**L**G**D**L**G**K**N. . . . . M**S**Q**S**W**Y**E. . . . . C**F**L**F****W**F**T**I**K**T**E****M**R**A**V**I**K**N**S**Q**.K**P**K. . . . .

EBOLA\_L                    . . . . . I**L**S**S**. . . . . I**Q**G**N**E**F**L**H**. . . . . Q**M**F**F****W**Y**D**L**A**I**L**T**R**R**G**R**L**N**R**G. **N**S**R**S**T**

MARBURG\_L                    . . . . . E**D**F**S**. . . . . P**K**E**N**P**Y**Y**W**. . . . . G**M**L**L**V**H**L**S**Q**L**A**R**R**I**K**G**Q**R**G. **S**L**R**S**N**

VSV\_L                    . . . . . E**Y**I**K**K**E**R**W**T**D**S**F**K. **I**L**A**Y**L**C**Q**K**F**L**D**L**H**K**L**T**L**I**L**N**A**V**S**E**V**E**L**L**N**I**A**R**T**

RABIES\_L                    . . . . . I**P**P**E**G**V**L**S**C**L**E**K**V**D****Y**D**K**A**F**G**R**Y**L**A**N**T**Y**S**S**Y**L**F**H**V**I**I**L**Y**M**N**A**L**D**R**D**E**E**K**T**I**L**A**L**

HMPV\_L

β2                    TT                    β3                    β4

170                    180                    190

HMPV\_L                    . . . . . V**I**R**T**G**S**I**C**. . . . . R**S**L**G**K**L**V**F**I. . . . . V. . . . . S**S**Y**G**C**I**V**K**. . . . .

RSV\_L                    . . . . . V**K**N**H**G**F**I**L**I**D**N**H**T**L**N**G**F**Q**F**I**. . . . . L. . . . . N**Q**Y**G**C**I**V**Y**. . . . .

hPIV3\_L                    . . . . . F**N**M**G**K**D**Y. . . . . N**L**L**E**D**Q**K**N**L**L**L**I**. . . . . H**P**E**L**V**L**I**D**. . . . .

MUMPS\_L                    . . . . . L**T**. . . . . D**L**V. . . . . T**I**V**D**T**R**S**T**L**C**I. . . . . T**P**E**L**V**A**L**Y**S. . . . .

MEASLES\_L                    . . . . . H**R**R**R**H**T**P. . . . . V**F**F**T**G**S**S**V**E**L**L**I**. . . . . S**R**D**L**V**A**I**S**. . . . .

NIPAH\_L                    . . . . . F**R**S**D**S**C**I. . . . . I**H**M**R**D**K**S**T**E**I**L. . . . . N**P**N**L**C**I**F**Q**S. . . . .

EBOLA\_L                    . . . . . W**F**V**H**D**D**L**I**. . . . . D**I**L**G**Y**G**D**V**V**F**W**K**I**P**S**M**L**P**L**N**T**Q**G**I**. . . . . P**H**A**M**D**W**Y**Q**S**V**F**K**E**A**V

MARBURG\_L                    . . . . . W**K**F**I**G**T**D**L**. . . . . E**L**F**G**I**A**D**F**V**I**F**K**V**P**V**K**T**I**I**R**N**A**V**S**L**Q**A**S**K**P**G**L**R**I**W**Y**R**D**Q**N**L**T**P**Y**L

VSV\_L                    F**K**G**K**V**R**R**S**S**H**G**T**N**I**. . . . . C**R**I**R**V**P**S**L**G**P**T**F**I**S**E. . . . . G**W**A**Y**. . . . .

RABIES\_L                    W**K**.D**L**T**S**V**D**I**G**K**D**L. . . . . V**K**F**K**D**Q**I**W**G**L**L**I**V**T**K. . . . . D**F**V**Y**. . . . .

β5 α8

HMPV\_L 200 210 220 230 240 250

HMPV\_L SNKSKRVSFTRYNQLTWKDVMLSRFANFCIWVSNLSLNEQEGGLRSNLQGMLETNKLTY

RSV\_L HKELKRITVTFTYNOFLTWKNISLSRLNVCLITWISNCLNLTNLKSLGLRCGFNNVITLQLF

hPIV3\_L .KQNYNGYLI TPEL VLMYCDVIEGRWNISACAKLDPKL . . . . . QS . . . . . MYQKGNLW

MUMPS\_L .NEHKALTYLTFEMVLMVTDMLEGRNLVSSLTASHYL . . . . . SP . . . . . LKKRTEILL

MEASLES\_L .KESQHVYYLT FEFVLMYCDVIEGRMLTETAMTIDARY . . . . . TE . . . . . LLGVRVYMW

NIPAH\_L DKTGKCCYYLTPEMVLMYCDVLEGRMMMETTVKSDIKY . . . . . QP . . . . . LISRSNALW

EBOLA\_L QGHTHIVSVSTADVLMICKDLITCFNNTTLSKIAFIEDPVCSDYP . . . . . NFKIIVSMLY

MARBURG\_L CDDEFIVSVASYECFIMIKDVFIERNTWEICARAWLEDSDGADYP . . . . . PLDVLGELY

VSV\_L . . FKLLDILMDRNFLLMVKDVIIGRMQTVLSMVCRI . . . . . DNLFSQDIFSLNLY

RABIES\_L . . SQSSNCLFDRNY TMLKDLFLSRFNSLMILLSP . . . . . EPLYSDDLIAQLCQLY

α9 α10 α11

HMPV\_L 260 270 280 290 300

HMPV\_L ETVDYMLSLCCNEGFLVKFEFEGFIMSEILRITE.HAQF . . STRFRNTLLNGLYITDQLTK

RSV\_L LYGDCLIKLIFHNVEGFYIIEKEVEGFIMSLILNTE.EDQF . . RKRFRNYSMLNNITDANK

hPIV3\_L EVIDKLFPIIMGEKTFDVIILLPALLSLIQTHDP.VKQL . . RGAFLNHHVLSMELIFES

MUMPS\_L TLVDDLALMGDKVYGVVSSLSFVYVYQYGDV.VVDI . . KGT FYGFICNEILLDLTE

MEASLES\_L KLIDGFFPALGNPTQYIVAMLEPLSLAYLQLRDI . TVEL . . RGAFLNHCFTETIHDVLDO

NIPAH\_L GLIDPLFFVWGNRIYNIIVSMIEPLVLLALQLKDE.ARIL . . RGAFLHHCICEKMHQLSE

EBOLA\_L QSGDYLLSILGSDGYKLIKFLPELCLAKIQLCSK.YTER . . KGRFLTQMHLVAHNTLEE

MARBURG\_L NQGDIIAMYLEDDGFKLIKHLPELVCVSCIQTHGI.FTPR . . KYWFFQSQMLKSYVDELHD

VSV\_L RIGDKIVERQGNFSDYDLIKMVPEICNKLMLKLARESRPLVPQFPFHENHIKT . . . . SVDE

RABIES\_L IAGDQVLSMCGNSGYEVIKILEPYYVNSLVRRAEKFRPLIHLGDPVFFIKD . . . . KVSQ

α12 α13

HMPV\_L 310 320 330 340 350 360

HMPV\_L LKNKNRLRVHSTVLENN . . DYPMYEVVLKLLGDITL.RCIKLLINKNLNAAYELYEIFRIF

RSV\_L AQKNLLSRVCHTLLDKTVDNIINGRWIILLKSKFL.KLIKLAGDNNLNLSELYFLFRIF

hPIV3\_L RESIKEFL . . . . . SVDYIDKILDIIDKSTIDEIAEIFSFRTF

MUMPS\_L DNIFTEEE . . . . . ANKVLLDLTSQFDNLSPDLTAELLCIMRLW

MEASLES\_L NGFSDGFT . . . . . YHELTEALDYIFITDIDLHGTETIYISFFFRSF

NIPAH\_L CGFTDQKI . . . . . RSMFIDDLISILNIDNHLLEFFSFRTF

EBOLA\_L ITEMRALKPSQA . . . . . QKIREFHR . TLIRLEMTPQQCLELFSIQKHW

MARBURG\_L LNLKLQISDNKA . . . . . ECAQNFIK . TIVQAKLTPQQYCSLQKHW

VSV\_L . . GAK . . . . . IDRGIRFLHD . QIMSVKTVDLTLVIYGSFRHW

RABIES\_L LEGTF . . . . . GPSAKRF.F.K . VLDDQFNIHDLVFFVYGCYRHW

α14 β6 α15

HMPV\_L 370 380 390 400 410 420 TT

HMPV\_L GHPMVDERDAMD AVKLNNEITKILRLESLETLRGAFILRITIKGFVDNN.KRWPKIKNLKV

RSV\_L GHPMVDERQAMD AVKNCNETKFYLLSSLMLRGAFAIYRITIKGFVNNY.NRWPTLRNAIV

hPIV3\_L GHPPLIASIAAEKVRKYMYIEKQLKFDITINKCHAFICTIINGYRERHGGOWPPTLPDH

MUMPS\_L GLPPLTASQAASKVRKESMCAVKVLDQFTIMKTAFFFHALINGYRSHNGIWPPPTLHGN

MEASLES\_L GHPPLA VTAENVRKYMNQPKVIIVYETLMKGHAIFCGIINGYRDRHGGWPPPTLPLN

NIPAH\_L GHPPILEAKVAEKVREHMLADK VLEYAPIMKAHAFICGTIINGYRDRHGGWPPPTLPLPAH

EBOLA\_L GHPPLVHSETAIQKVKKHAQSTKILKPKVMFETFCVFKFIVAKNHYHSQ.GSWSYVTSDRN

MARBURG\_L GHPPLYNDVALDKVKKHAQSTKILKPKVMFETFCVFKFIVAKNHYHSQ.GSWSYVTSDRN

VSV\_L GHPPLIDYVTGLEKLLHSQVTMKKIDIVSYAKALASDLARIVLFQQFNH.KKWFVNGDPLL

RABIES\_L GHPYIDYRKGLSKLYDQVHMKKVIDKSYQECCLASDLARRILRWGFQDKY.SKWFYLDLDRFLA

α16 α17 α18 α19

HMPV\_L 430 440 450 460 470 480

HMPV\_L LSKRWTMFYKAKNYPSQLELSEQDFLEAAIQFEQEFSVPKKTNLEMLVNDKAITSPKRL

RSV\_L LPLRWLTYYKLNITPSLLELTERDLIVLDSLRFYREFRIPKPVLDLEMITNDKAITSPKRL

hPIV3\_L AHEFIINAYGNSAISYEN.AVDYYSFIGIKFNKFIQPOLDEDLTYMKDKALSPKSN

MUMPS\_L APKSLIEMRHNSSELKYEY.VLKNWKSISMLRIHKCFDASPEDLSTFMDKAITSPKQD

MEASLES\_L AADTIRNAQASGEGTHEQ.CVDNWKSFAGVFKFCFMPPLSLDSDLTMYLKD KALAAALQRE

NIPAH\_L ASKHIIIRLKNSESITIDD.CVKNWESFCGIQDFCMECLKLSDLSMYMKDKALSPKIDE

EBOLA\_L LTPGLNSYIKRNQFPPLPM.IKELLWEFYHLDHPPFSTKIIISDLSIFIKDRATAVERTC

MARBURG\_L LTPYLRQHIVSNSSPSQAE.IYQHLWEWYFVEHEPLFSTKIIISDLSIFIKDRATAVNQEC

VSV\_L HDHPFKSHVKNETWPTAAQ.VQDFGDKWHEPLIKCFEIPDLLDPSIYSDKSHMNRSE

RABIES\_L QDHP LTPYVKETQTWPPEPRHI.ADLVGDTHWKLPITQI FEIFESM DPELTDKSHLSTR

## Motif G

α20 α21 α22 α23

HMPV\_L 490 500 510 520 530 540 TT

HMPV\_L IWSVYPKNYLPETIKNRYLEETFNASDSLKTRRVLEYYLKDNKFDQKE LKSYVVRQGEYLN

RSV\_L IWTSPRNYMPSHIQNYIEHEKLFSESDKSRRLVEY YLRDNKFNEDCLYNCVVNQSYLN

hPIV3\_L WD TVY PANSNLLYRT . . . . . NASN SRRLVEYV IADSKF FDPHQLD YVESGDWLD

MUMPS\_L WMGVFRRSLIKQRYR . . . . . DANRPLPQPF NRLLLNFL EDDRFD DPKELEYVTSGEYLR

MEASLES\_L WD SVYPKEFLRYDP . . . . . PKGTG SRRLVDVFLNDSSFPDPYDVIMYVSSGAYLH

NIPAH\_L WD SVYPREVLSYTP . . . . . PKSTE PRRLVDV FVNDENFDPYVML EYVLSGAYLH

EBOLA\_L WDAVFEPNVLGYNP . . . . . PHKFS KRVPEQFL EQENF SIENVLSYQKLEYLH

MARBURG\_L WDSVDFR SVLGYNP . . . . . PVRFO SKRVPEQFL GQADFSLNQILEFAEKLEYLA

VSV\_L VLKHHVMN . . . . . P . . . . . NTPIP SKKVLQTM LDTKATNWKEFLKEID.EKGLD

RABIES\_L LASHVLE . . . . . R . . . . . GGPVPSEKVIITALE SKPPINPREFLKSID.LGGLP

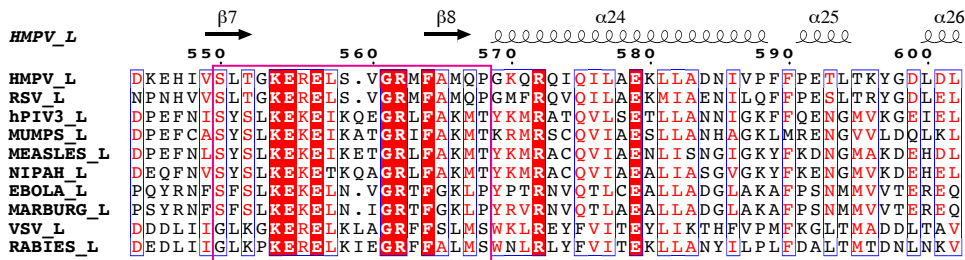

### Motif F

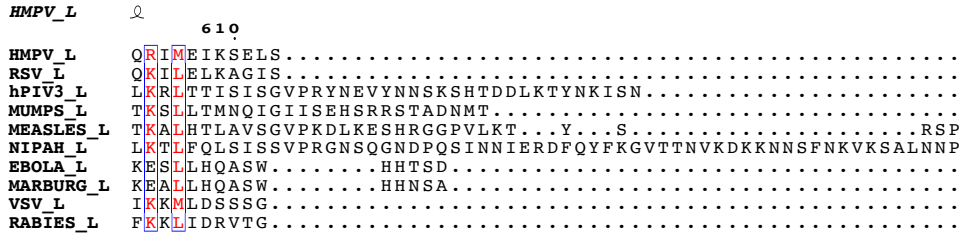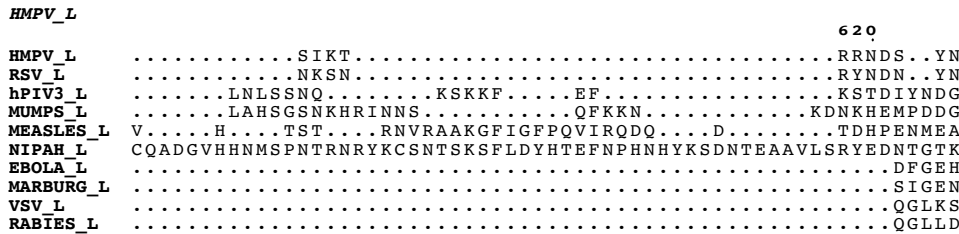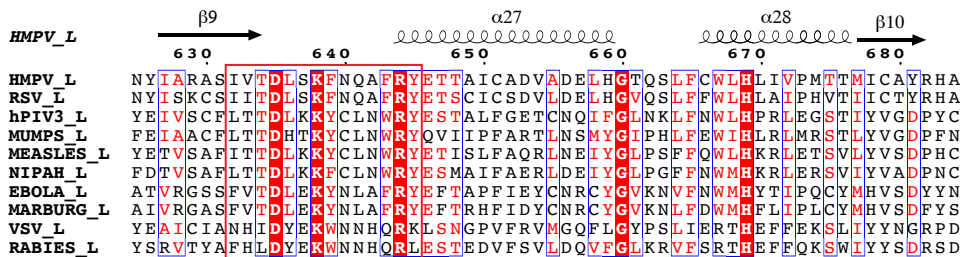

### Motif A

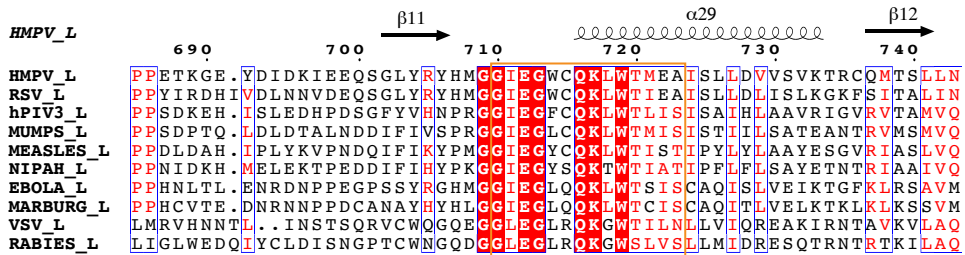

### Motif B

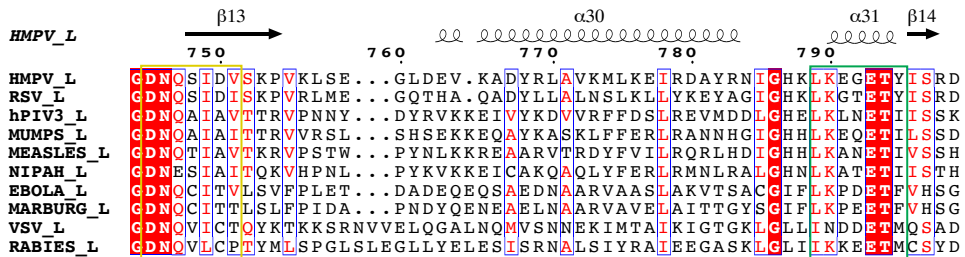

### Motif C

### Motif D

$\beta 15$   $\beta 16$   $\alpha 32$   $\alpha 33$   
 HMPV\_L 800 810 820 830 840 850  
 HMPV\_L IQSEGVVHPFKKVLRVGPWINTLDDIKTSAESIGSLCQEL...EFRGES  
 RSV\_L MQFMSKTIQHNGVYYPASIKKVLRVGPWINTLDDFKVLSLEIGSLTQEL...EYRGES  
 hPIV3\_L MFIYSKRVIYDGRILTQALKALSRVVFVSETVIETRASSNLATSAFAK...IENGY  
 MUMPS\_L FFYYSKRVIYDGRILTQALKALSRVVFVSETVIETRASSNLATSAFAK...TENGE  
 MEASLES\_L FFVYSKGIHYDGLLVVQSLLKSIARCVFVSETVIETRASSNLATSAFAK...IERGYD  
 NIPAH\_L LFIYSKGIHYDGLLVVQSLLKSIARCVFVSETVIETRASSNLATSAFAK...IENGLS  
 EBOLA\_L FIYFQKKQYLVNGLVLPQSLKATRMAPLSDAIFDDLOGTLASIGTAFERS...ISETRH  
 MARBURG\_L FIYFQKKQYLVNGLVLPQSLKATRMAPLSDAIFDDLOGTLASIGTAFERS...ISETRH  
 VSV\_L YLNYGKIPIFRGVIRGLETKRWSRVTCVTND...QIPTCANIMSSVSTNALTVAHFAEN  
 RABIES\_L FLIYKTPLFRRGNILVPEESKRWARVSCISND...QIVNLANIMSTVSTNALTVAQHSQS

## Motif E

$\alpha 34$   $\alpha 35$   $\alpha 36$   
 HMPV\_L 860 870 880 890 900 910  
 HMPV\_L IIVSLILRNFWLYNLYMHESKQHPFLAGKQLFKQLNKTLTSVQRFPEIKRENEVDLWMMNI  
 RSV\_L LLCSLIFRNWVLYNQIALQ LKNHALCANNKLYLDLKV LKHLKTFNLDNIDTALPLIYMMNI  
 hPIV3\_L PVLGYACSIKFNQI...QLYIALG...MNIPTITQNIIRD.QYFRNPWMOYASLI  
 MUMPS\_L KDLCYFLNAPMTIR...QCYDLV...FPQTKLSQDITN.AYLNHPILISRLCLL  
 MEASLES\_L RYLAYS LNVLKVIQ...QILISLG...FTINSTMRDVI.PLLTNNDLIRMALL  
 NIPAH\_L RNVGYCINILKVIQ...QLLISTE...FSINETLTDVTS.PISNNLDWLIITAAI  
 EBOLA\_L IFPCRITAAFHTFFSVRILQYHHLG...FNKGFDLGQLTLG.KPLDF.GTISLALAV  
 MARBURG\_L IFPSRWIASFHSMLAINLLNQNHG...FPLGFNIDISCFK.KPIITF.SKLIITIT  
 VSV\_L PINAMIQYNYFGTFARLLLMMHDPALRQSLYEVQDK...IPGLHSSTFKYAMLYL  
 RABIES\_L LIKPMRDFLLMSVQAVFHYLFLSPILKGRVYKLSA...E.GESFLLAMSRITLYL

$\alpha 37$   $\alpha 38$   $\alpha 39$   
 HMPV\_L 920 930 940 950 960  
 HMPV\_L PMQFGGDPPVVFYRSFYRRTPDFLTEAISHVDILLKISAN...IKNETKVSFFK  
 RSV\_L PMLFGGDPPNLLYRSFYRRTPDFLTEAIVHSVFLSYTNDLKDQLDSDDRLNKFLT  
 hPIV3\_L PASVGGFNFMAMSRCFVRNIGDPSVAALADIKRFIKANQLD...RSVVL  
 MUMPS\_L PSQLGCLNFLSCSRFLFRNIGDPLVSAIADVKRLIKAGCLD...IWVVL  
 MEASLES\_L PAPIGGFNLYLNMSRFLFRNIGDPLVSAIADVKRMLIASLMP...EETL  
 NIPAH\_L PAPIGGFNLYLNMSRFLFRNIGDPLVSAIADVKRMLIASLMP...EETL  
 EBOLA\_L PQVLLGGLSFLNPEKCFYRNIGDPLVSGFLQKTYLRMIEMD...DLF  
 MARBURG\_L PQVLLGGLSFLNPEKCFYRNIGDPLVSGFLQKTYLRMIEMD...DLF  
 VSV\_L DPSIGGVSGMSLSRFLIRAFDPDVTESLSFWRFIHVHARSE...HLKE  
 RABIES\_L DPSIGGVSGMSLSRFLIRAFDPDVTESLSFWRFIHVHARSE...HLKE

$\alpha 40$   $\alpha 41$   
 HMPV\_L 970 980 990 1000 1010 1020  
 HMPV\_L ALLSIEKN...ERATLTTLMRDPAQVGSERQAKVTSINRNTAVTSTLSPNQLFSDS  
 RSV\_L CIIITFDKN...PNAEFVTLMRDPAQVGSERQAKVTSINRNTAVTSTLSPNQLFSDS  
 hPIV3\_L YRIMNQEP...GESSFLDWAADPYSYCNLPQSQNTTMIKNITARNVLDSPNPLLSGL  
 MUMPS\_L YNILLGRRP...GKQKSTLAAADPYSYCNLPQSQNTTMIKNITARNVLDSPNPLLSGL  
 MEASLES\_L HQVMTQQP...GDSFSLDWAADPYSYCNLPQSQNTTMIKNITARNVLDSPNPLLSGL  
 NIPAH\_L QKVMNQEP...GDSFSLDWAADPYSYCNLPQSQNTTMIKNITARNVLDSPNPLLSGL  
 EBOLA\_L LPLIAKNP...GNCTAIDFVLPNLSGFLNVPQSITRLLKNTARFVLIHSPNPLLSGL  
 MARBURG\_L YLIISSKP...GLADASDFVLPNLSGFLNVPQSITRLLKNTARFVLIHSPNPLLSGL  
 VSV\_L MSAVFGNPEIAKFRITHIDKLVEDPSTLNIAMGMSPANLKTVEVK.KCLIESRQTRNQV  
 RABIES\_L LCHEAGNPDLDGERTLESFTRLLEDPSTLNIAMGMSPANLKTVEVK.KCLIESRQTRNQV

$\alpha 42$   $\alpha 43$   $\alpha 44$   
 HMPV\_L 1030 1040 1050 1060 1070 TT  
 HMPV\_L AI...HYS.RNEEVGIIAENITPVYPHGLRVLYESLPFKAEKVVNMI SGTKSITNLLQ  
 RSV\_L AQ...HYT.TTEIDLNDIMQNIETPYPHGLRVLYESLPFKAEKIVNLI SGTKSITNILE  
 hPIV3\_L FT...NTMIEEDELAEFLMDRVIILPRVAHDILDNSLTGIRNAIAGMLDTKSLIRVGI  
 MUMPS\_L FS...ENAAEEDELAQYLLDREVVMPRVAHDILDNSLTGIRNAIAGMLDTKSLIRVGI  
 MEASLES\_L FH...DSSKEEDELAAFLMDRHIIVPRAAHEILDH SVTGAREE IAGMLDTKSLIRASM  
 NIPAH\_L FH...DKSFEDELAAFLMDRVIILPRAAHEILDH SVTGAREE IAGMLDTKSLIRASM  
 EBOLA\_L FH...ASADFEDMVCWLLSSTPVMSSRFADIFSRTPSGKRLQILGYLEGTRTLASKI  
 MARBURG\_L FH...IGSDLEDQRCVCEWLLSSTPVMSSRFADIFSRTPSGKRLQILGYLEGTRTLASKI  
 VSV\_L IKDATIYLYHEEDRLRSFLWSINLFPRLFSEFKSGTFLGVADGLISLIFQNSRTIRNSFK  
 RABIES\_L FREAILLSKTHRDNFIFLKSVEPLFRFLSELFSSSFLGIPESIIGLIQNSRTIRNQFR

$\beta 17$   $\alpha 45$   $\alpha 46$   
 HMPV\_L 1080 1090 1100 1110 1120 1130  
 HMPV\_L RTSAINGEDIDRAVSMMLLENLGLLSRITLSV.VVDSIEIPFKSNGRLICCCQISRTLRBTSSW  
 RSV\_L KTSADLTDIDRAVSMMLLENLGLLSRITLSV.VVDSIEIPFKSNGRLICCCQISRTLRBTSSW  
 hPIV3\_L NRGGLTYSLLRKISNYDLAQYETLSRT...LRLIVSDKIR.YEDMCSVDLAIAIRQKMW  
 MUMPS\_L EVRPLSARKLNTVIEYNLLYLSYNLEIEKPNIVQPFNAI.NVDTCSIDIAIRSRKLSW  
 MEASLES\_L RKGGLTSRVITRLSNYDYEQFRAGMVL...LTGRKRNVLI.DKESCSVQLARARSHMW  
 NIPAH\_L RKGGLTSRVITRLSNYDYEQFRAGMVL...LTGRKRNVLI.DKESCSVQLARARSHMW  
 EBOLA\_L INNNTETPVLDRLRKITLQRWSLWFSYLDH...CDNILAEAL.TQITCTVDVAQIEEYSSW  
 MARBURG\_L ISLTTTEGTM LMKLRELTRNRWKSWSYIDA..LDDDLSESL.EKFTCTVDVANFBRAYSSW  
 VSV\_L KKYHRELDLIVRSEV...SSLTLH...GKHLHRRGSCKMWTCSATHADTDRYKSW  
 RABIES\_L KSLSRTELESFYNSEI...HGINRM...TQTPQR..VGRVWP.CSSEADLREISW

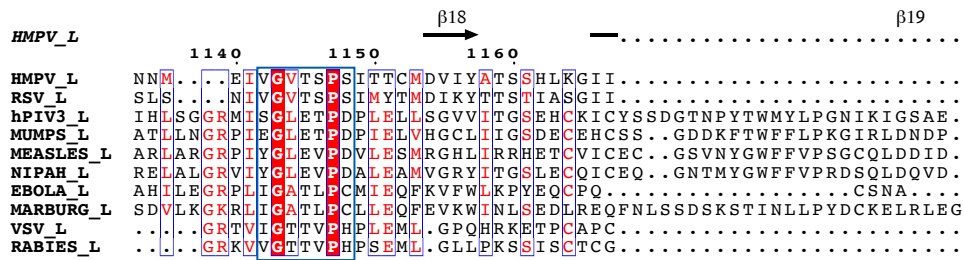

**Motif A'**

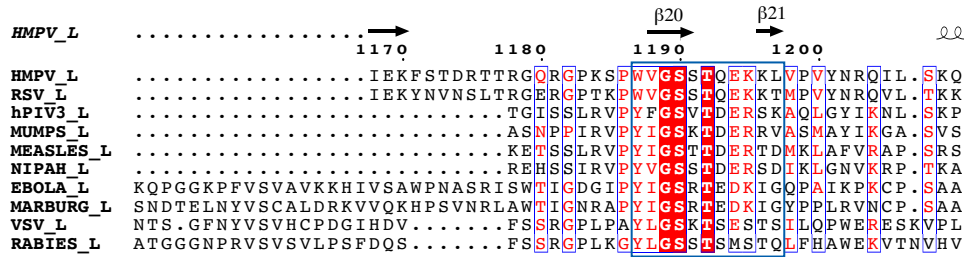

**Motif B'**

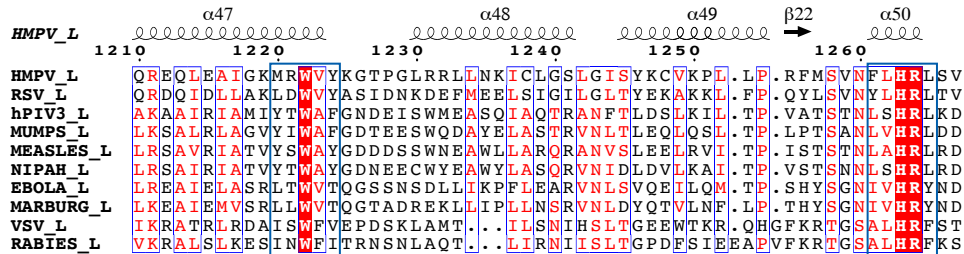

**Motif C'**

**Motif D'**

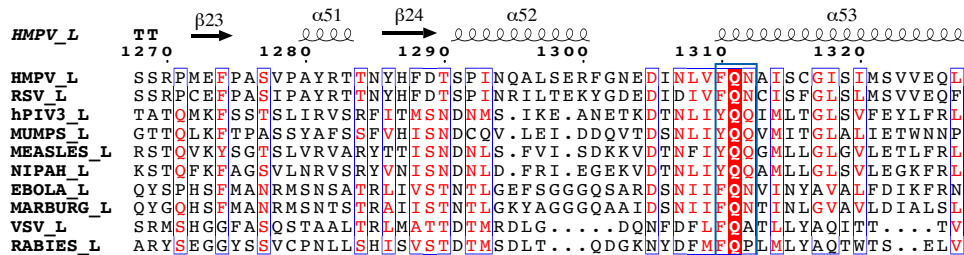

**Motif E'**

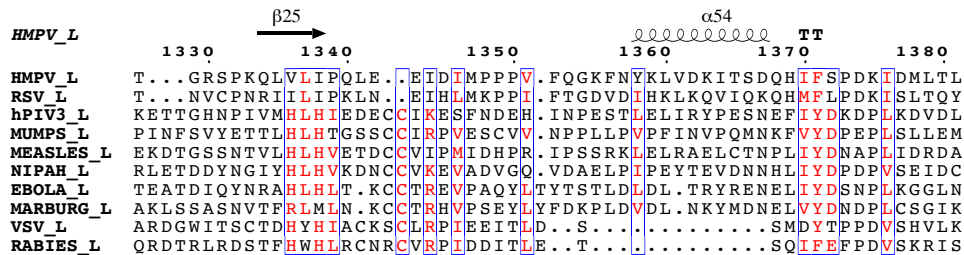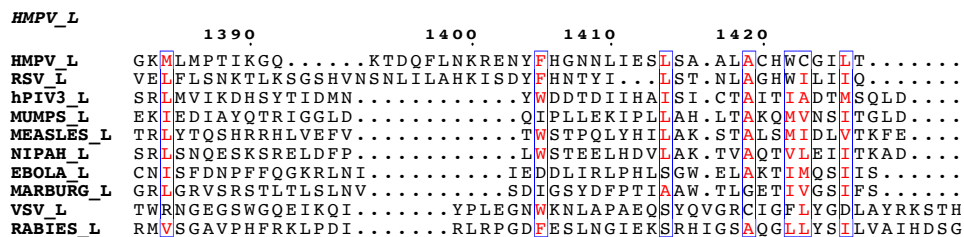

**Supplementary figure 2** - Structure-based alignment of L from HMPV, RSV, human parainfluenza virus 3 (hPIV3), Mumps virus, Measles virus, Nipah virus, Ebola virus, Marburg virus, VSV and Rabies Virus. Accession codes for the sequences included in the alignment are: HMPV\_L: Q6WB93.1; RSV\_L: NP\_044598.1; hPIV3: ACJ70091.1; MUMPS\_L: ACH78356.1; MEASLES\_L: AAF85706.1; NIPAH\_L: NP\_112028.1; EBOLA\_L: Q05318.2; MARBURG\_L: ABA87130.1; VSV\_L: Q98776.1 and Rabies\_virus L: BAA24082.1. Secondary structures of HMPV-L (this work) are displayed above the alignment. The domains of L are indicated by a colored bar below the alignment (NTD, grey; RdRp, aquamarine and capping domain, green). Evolutionary conserved motifs of the RdRp and capping domains are boxed. Polymerase motifs A-G were defined according to previous work<sup>40-43</sup>. In particular, we made use of the structure-based sequence alignment of HMPV-L (this work) with the poliovirus polymerase (PDB code: 1RA6). The five capping motifs are labeled A'-E'. The r.m.s.d. between the structure of HMPV-L and RSV\_L<sup>16</sup> is 1.21 Å over 1282 residues.
